# Supplementary material
Source: PubMed Central journal article supplement (PMC3596137)

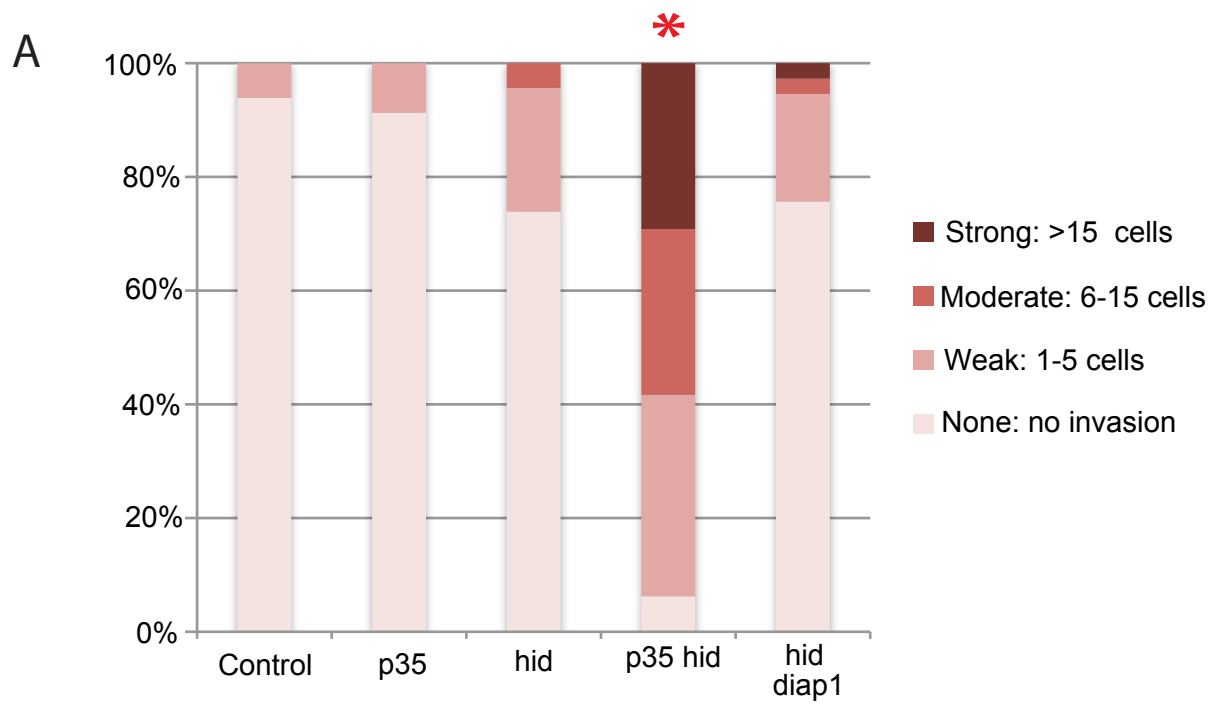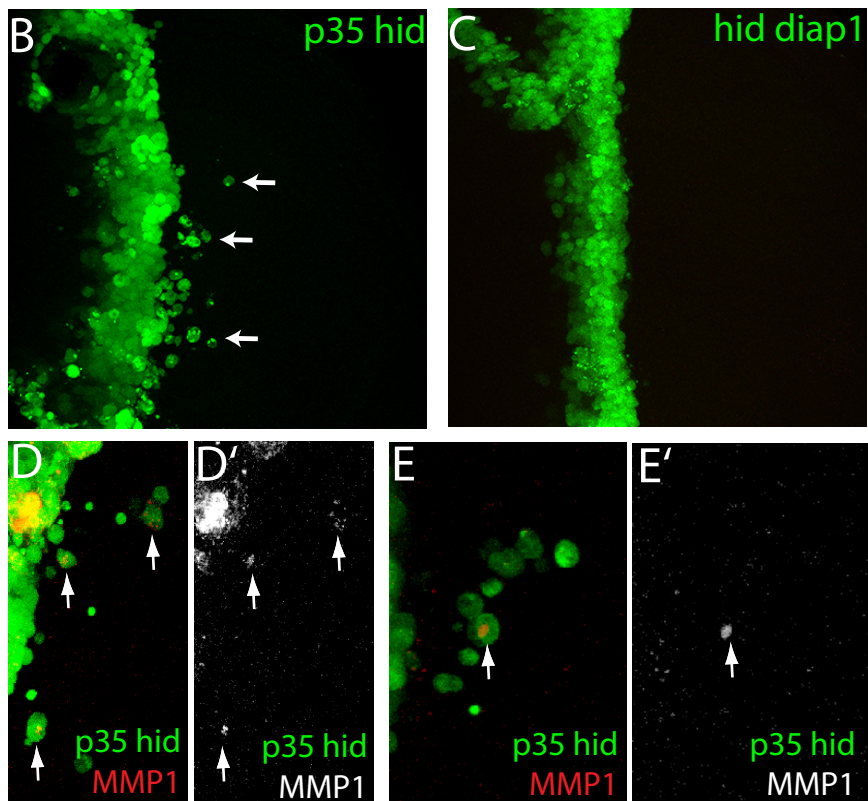

Supplementary Figure 1

Rudrapatna et al

Supplement: embor2012217s1.pdf [file embor2012217s1.pdf]

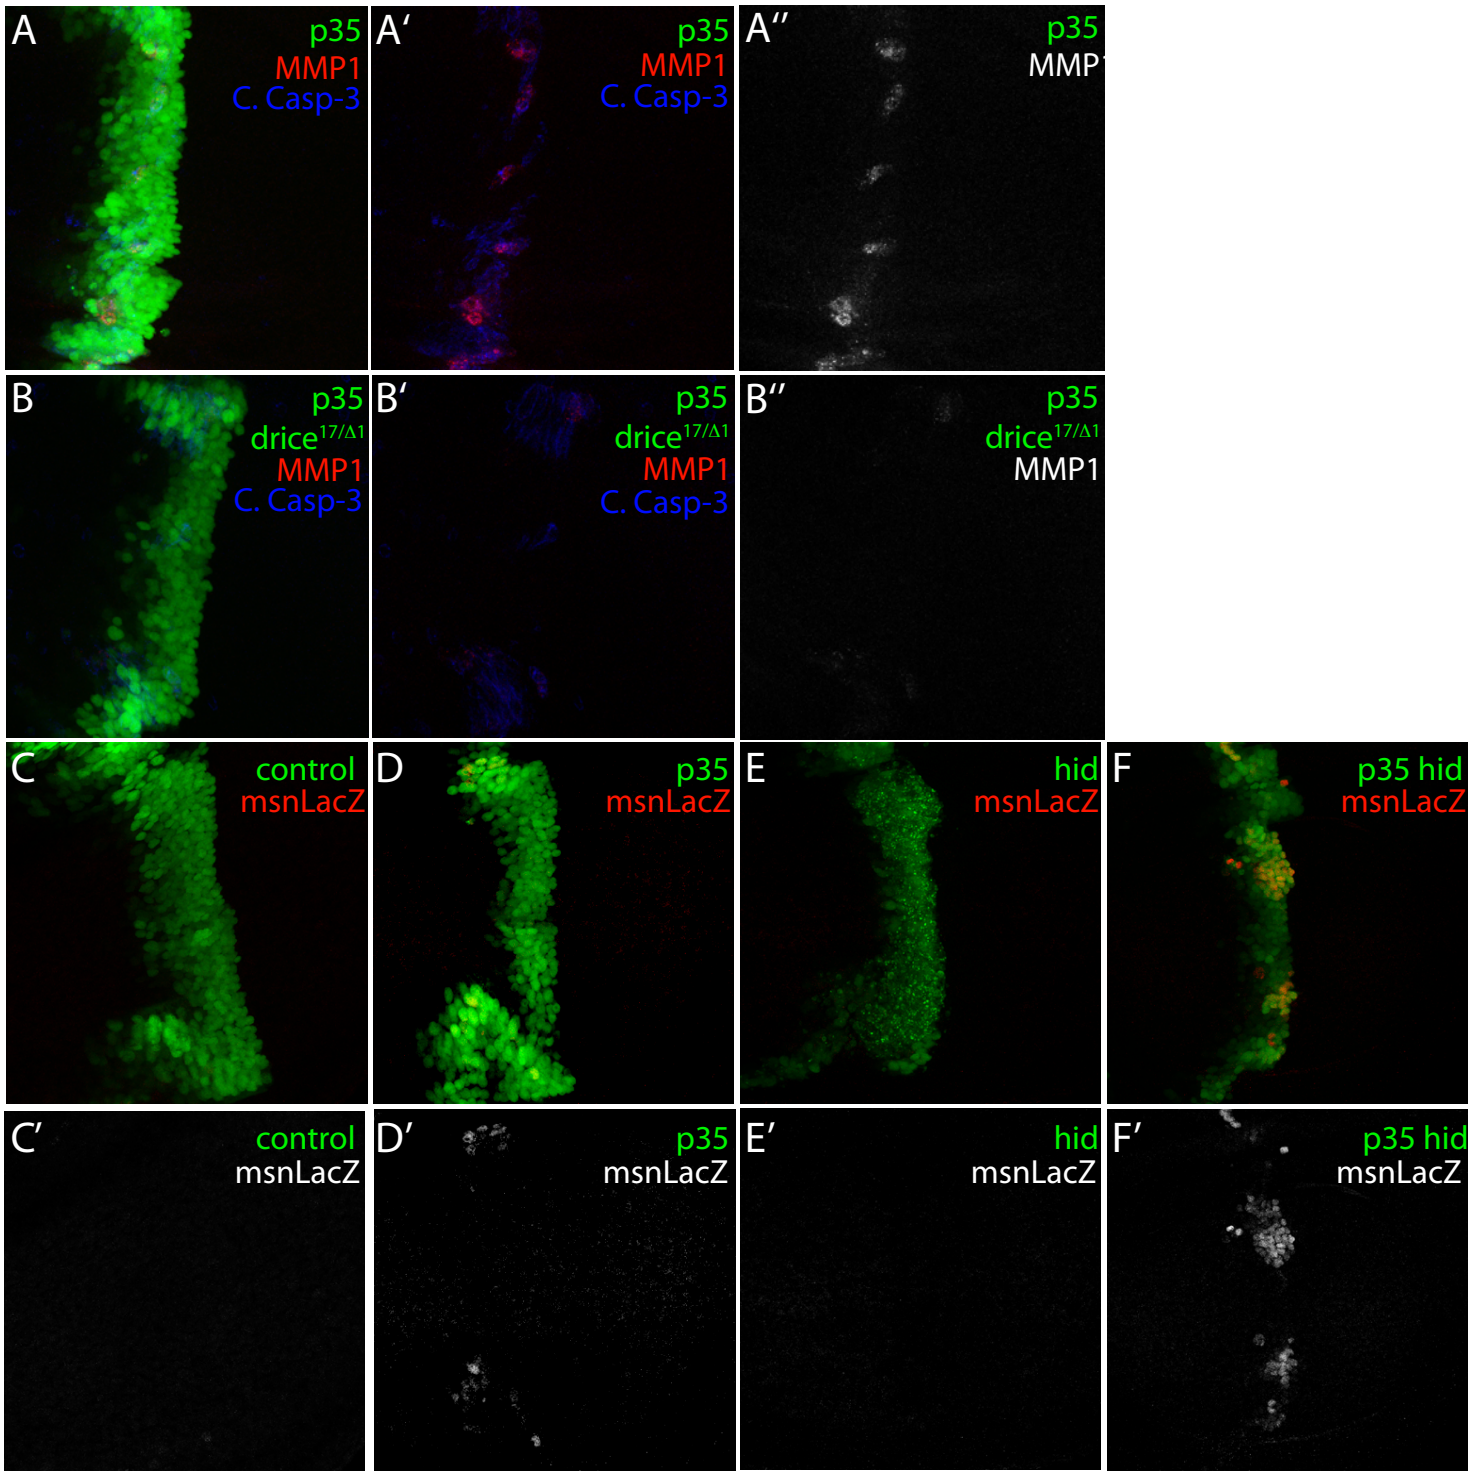

Supplementary Figure 2

Rudrapatna et al

Supplement: embor2012217s2.pdf [file embor2012217s2.pdf]

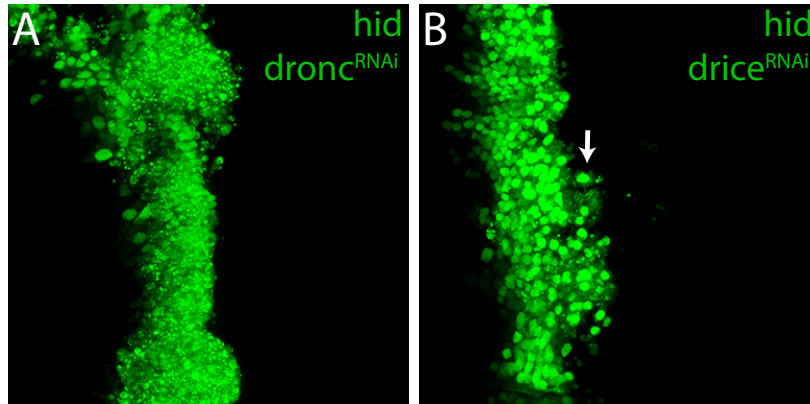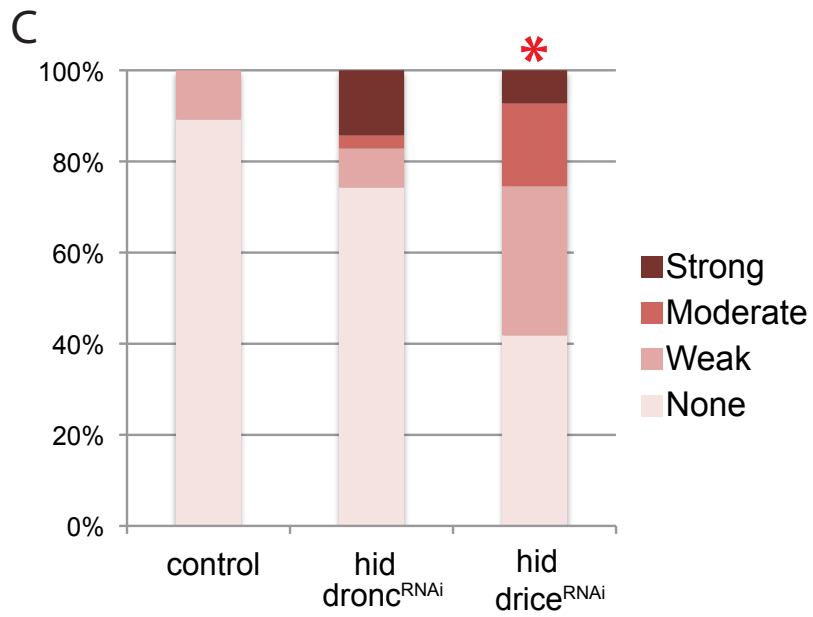

### Supplementary Figure 3

Rudrapatna et al

Supplement: embor2012217s3.pdf [file embor2012217s3.pdf]
